# Supplementary material for: Increased Glutamate in Somatosensory Cortex in Functional Dyspepsia
Source: PubMed Central journal article supplement (PMC5478635; doi:10.1038/s41598-017-04405-1), 2017-06-20
Supplement: 41598_2017_4405_MOESM1_ESM.pdf [file 41598_2017_4405_MOESM1_ESM.pdf]

## Supplementary Information

### Title: Increased Glutamate in Somatosensory Cortex in Functional Dyspepsia

Lead author: Arthur DP Mak

Co-authors: Georg Northoff, David KW Yeung, Winnie CW Chu, Steve CN Hui, Cynthia Cheung, Jessica Ching, Linda Lam, Sing Lee, Justin Wu

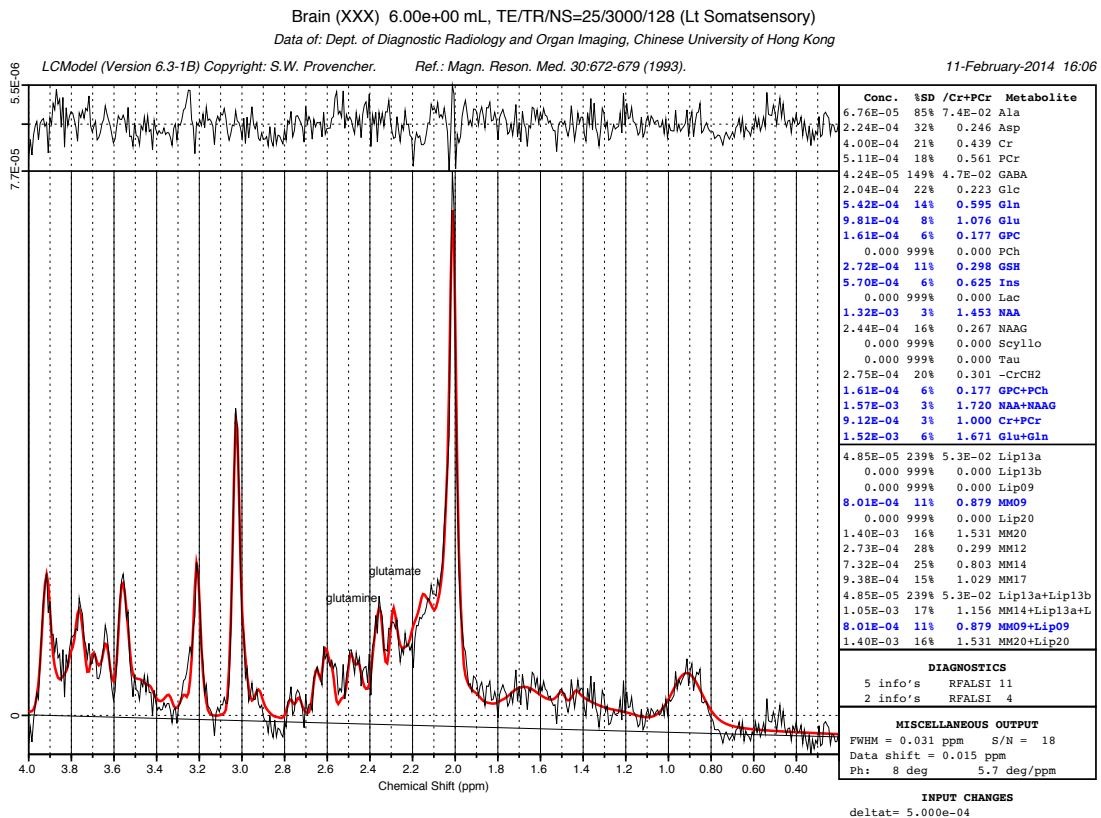

## Suppl S1

### Typical MRS spectra of a patient with FD-PDS

**Suppl S2. Comparison of Regional GM/WM Ratio and Menstrual Phase between Patients with FD-PDS and Healthy Controls**

|                                         | FD-PDS     | Control    | <i>P</i> |
|-----------------------------------------|------------|------------|----------|
| <b>GM/WM ratio</b>                      |            |            |          |
| Left SSC                                | 1.19(0.48) | 1.13(0.22) | 0.62     |
| Bilateral pgACC                         | 6.12(1.75) | 5.27(1.46) | 0.14     |
| Left insula                             | 2.13(0.47) | 2.11(0.51) | 0.91     |
| <b>FWMH</b>                             |            |            |          |
| Left SSC                                | 0.04(0.01) | 0.04(0.01) | 0.72     |
| Bilateral pgACC                         | 0.04(0.01) | 0.04(0.01) | 0.49     |
| Left insula                             | 0.05(0.01) | 0.05(0.01) | 0.07     |
| <b>Menstrual phase</b>                  |            |            |          |
| Menstrual phase,<br>no. of subjects( %) |            |            | 0.78     |
| follicular phase                        | 6(35.3)    | 5(29.4)    |          |
| luteal phase                            | 5(29.4)    | 4(23.5)    |          |
| menopausal                              | 6(35.3)    | 8(47.1)    |          |

- $p < 0.05$

**Suppl S3. DSM-IV TR anxiety and depressive diagnoses of FD-PDS subjects**

9 subjects met criteria for an anxiety disorder

1 subject met criteria for Generalized anxiety disorder, social phobia and panic disorder with agoraphobia

1 subject met criteria for social phobia only

1 subject met criteria for agoraphobia without panic disorder

6 subjects met criteria for Generalized Anxiety Disorder

3 subjects met criteria for depressive and related disorders

2 subjects met criteria for a current Major Depressive Disorder

1 subject met criteria for Dysthymia.

**Suppl S4** Partial Correlation of SSC Glutamate with FD variables controlled separately for Depression (MADRS) and Anxiety (HAMA)

|                                    |           | Control variables      |            |
|------------------------------------|-----------|------------------------|------------|
|                                    |           | MADRS                  | HAMA       |
| postprandial distress duration     | r         | 0.64 *                 | 0.32       |
|                                    | BCa95% CI | 0.19-0.78 <sup>+</sup> | -0.02-0.68 |
| Frequency of postprandial fullness | r         | 0.48 *                 | 0.24       |
|                                    | BCa95% CI | 0.11-0.75 <sup>+</sup> | -0.14-0.64 |
| Frequency of early satiety         | r         | 0.26                   | 0.02       |
|                                    | BCa95% CI | -0.21-0.65             | -0.44-0.63 |
| Frequency of epigastric pain       | r         | 0.38                   | -0.11      |
|                                    | BCa95% CI | -0.004-0.62            | -0.67-0.57 |
| Global symptom distress            | r         | 0.29                   | 0.29       |
|                                    | BCa95% CI | -0.19-0.67             | -0.15-0.64 |

\* $p < 0.05$

<sup>+</sup>BCa 95%CI not including zero

Legend: BCa 95% CI: Bias corrected accelerated 95% confidence interval
